# Supplementary material for: Photomechanical mechanism and structure-property considerations in the generation of photomechanical work in glassy, azobenzene liquid crystal polymer networks
Source: Royal Society of Chemistry journal article supplement (doi:10.1039/c1jm14017e), 2011-11-09

## Supporting Information

**Figure S1.** Absorption spectrum of an OD filter set ranging from OD 0.5 to OD 5.0.

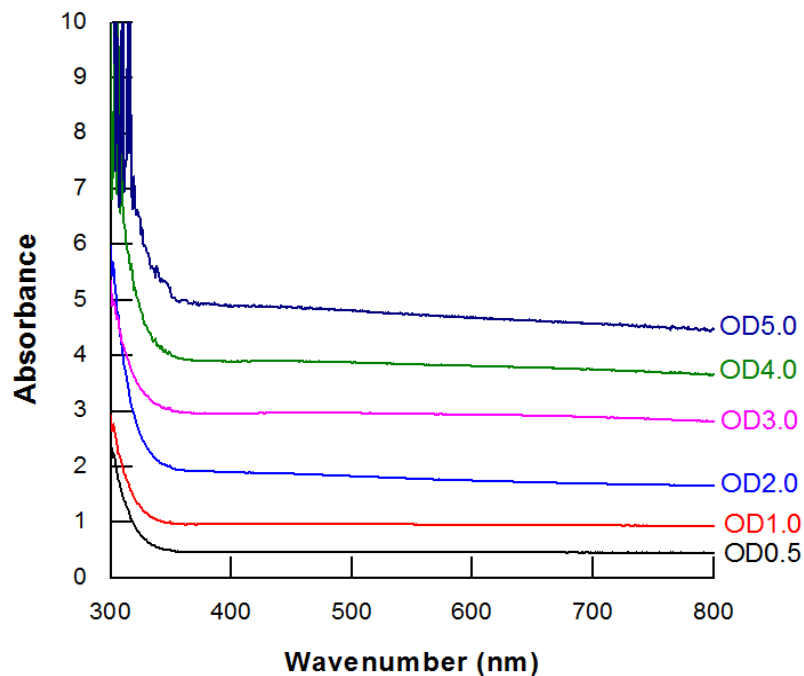

**Figure S2.** Absorption spectra for an 8  $\mu\text{m}$  thick sample of PD20CL-80CL. (—) Before exposure, (—) after three minute exposure to 300  $\text{mW}/\text{cm}^2$  442 nm polarized E//x, and (—) after three minute exposure to 60  $\text{mW}/\text{cm}^2$  375 nm polarized E//x.

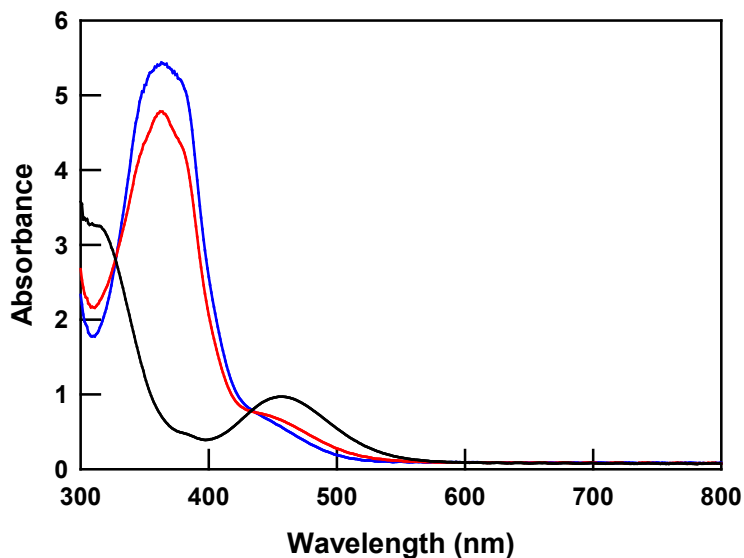

**Figure S3.** Polar plot of the peak absorption value at 365 nm ( $\pi-\pi^*$ ) for a 8  $\mu\text{m}$  thick sample of PD20CL-80CL (●) before exposure, (▲) after three minute exposure to 300  $\text{mW}/\text{cm}^2$  442 nm polarized E//x, (■) after three minute exposure to 300  $\text{mW}/\text{cm}^2$  442 nm polarized E $\perp$ x, and (▼) 672 hours (four weeks) after exposure was removed .

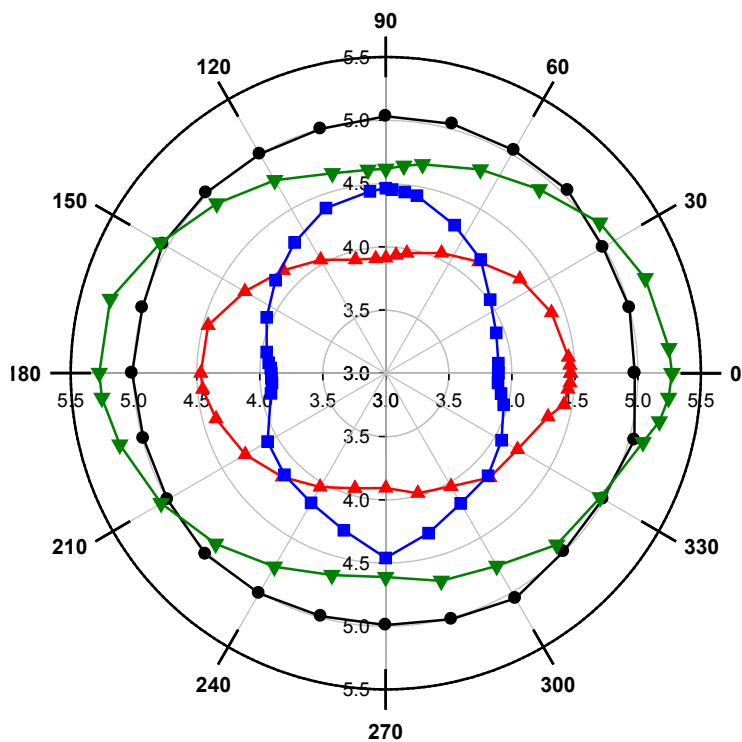

Supplement: c1jm14017e.pdf [file c1jm14017e.pdf]
